# Supplementary material for: Subjective and objective survival prediction in mechanically ventilated critically ill patients: a prospective cohort study
Source: Springer Nature journal article supplement (doi:10.1186/s13054-023-04381-1), 2023-04-19
Supplement: MOESM1 [file 25259668]

## ONLINE DATA SUPPLEMENT

### Predictors

At the time of study enrolment, potential predictors of outcome were assessed at study inclusion. Disease independent predictors included age, sex, weight, height, BMI and smoking status. Comorbidities (pulmonary, cardiac, renal, gastrointestinal, liver, cancer, neurological, endocrinological/diabetes, immunosuppression, chronic infection, chronic substance abuse, coagulopathy, trauma, organ transplant) and the fluid balance (euvolemic, hypo- or hypervolemic) were assessed by the responsible physician. It was also evaluated if the patients had a recent surgical intervention and were hospitalised within 90 days before ICU admission. The admission type (medical or surgical) and origin (home, hospital or other ICU) was documented. Several treatment parameters were assessed, namely the use of vasopressors and hemodialysis/-filtration, and mechanical ventilation settings (pressure- versus volume-controlled ventilation, tidal volume and positive end-expiratory pressure). Vital parameters (respiratory rate, O<sub>2</sub> saturation, heart rate, blood pressure, body temperature, Glasgow Coma Scale), urine output as well as arterial blood gas parameters (pO<sub>2</sub>, pO<sub>2</sub>/FiO<sub>2</sub>, pCO<sub>2</sub>, pH, HCO<sub>3</sub>, lactate), the blood count (leukocytes, hematocrit, platelets) and other blood parameters (glucose, Na, K, albumin, creatinine, urea, bilirubin, C-reactive protein, copeptin, proANP and proADM) were recorded. The Glasgow coma scale was assessed during a sedation pause or alternatively a GCS estimate of the neurological state before sedation was used.

## Statistical analysis

Descriptive statistics were expressed for continuous data as mean  $\pm$  standard deviation (SD), for categorical data as numbers (%). No patient was excluded from the analysis due to missing data. Logistic regression models were used to examine the univariable association between predictors and outcome. Odds ratios (OR) and 95% confidence intervals (CI) were calculated using the Mid-P exact test. In the case of categorical predictors, a reference category was chosen. In metric or ordinal predictors, the OR represents the ratio of the odds increasing the predictor one unit. To compare different predictors, OR were IQR-normalised to units and illustrated in forest plots. The overall p-values of categorical data with two or more groups were calculated with the chi-squared test or the fisher exact test if the frequency was smaller than 5 in any group. To assess the predictor relatedness, significant predictors of 28-day survival were correlated using Pearson correlation. A correlation matrix was generated and ordered via hierarchical clustering of absolute Pearson correlation coefficients. Raw correlation coefficients were then plotted in a heatmap. To analyse groups of multiple predictors, missing values were imputed using k-nearest neighbour imputation, setting k to 5 [1]. Single objective predictors provide inadequate risk estimates. Therefore, markers are commonly combined into more complex scoring systems to improve prognostic performance [2]. However, due to optimistic model development and different patient populations, the predictive performance of these models is often not replicated. We addressed this problem using different model development approaches and independent validation thereof. Predictors were then pooled into different prediction groups. Variables with a skewed distribution (platelet number, glucose, bilirubin, urea, CRP, lactate, INR, proANP and proADM) were log-transformed. To overcome the limitations of single statistical

approaches, we applied three different prediction methods: 1) Classic logistic regression models were estimated with a generalised linear model using the logit link function. 2) Lasso models were performed as reported previously, with the tuning parameter lambda and the parameter alpha set at 0.95 [3]. 3) Random forests were applied optimising the parameter mtry [4]. In lasso and random forest, the models were trained with a 10-fold cross-validation step repeated 10 times on the development cohort and then applied on the independent validation cohort to assess its performance [5]. For these algorithms tuning parameters were chosen to optimise the AUC (c-statistic). The discrimination of each model, i. e. the power to differentiate between outcomes, was evaluated with the c-statistic ranging from 0.5 (random discrimination) to 1 (perfect discrimination). The c-statistic was estimated using DeLong's test. Comparisons between c-statistics were performed on random forest models or subjective survival estimates and compared with the DeLong's test. Calibration, the agreement of predicted vs observed outcome frequencies, was graphically assessed by plotting the predicted survival probability against the observed survival using a loess smoother. The accuracy of the calibration curve is demonstrated with five points and error bars, based on the mean of predicted probabilities, within distinct survival intervals (0-0.2, 0.2-0.4, 0.4-0.6, 0.6-0.8, 0.8-1). Survival distributions were compared with the log-rank test for trend. All statistical analyses were performed in R, version 4.0.3 (R Project for Statistical Computing). 2-sided p values less than 0.05 were considered statistically significant.

## REFERENCES

1. Kowarik A, Templ M. Imputation with the R Package VIM. J Stat Softw. 2016;74.
2. Moons KGM, Altman DG, Reitsma JB, Ioannidis JPA, Macaskill P, Steyerberg EW, et al. Transparent Reporting of a multivariable prediction model for Individual Prognosis Or Diagnosis (TRIPOD): Explanation and Elaboration. Ann Intern Med. 2015;162:W1.
3. Friedman J, Hastie T, Tibshirani R. Regularization Paths for Generalized Linear Models via Coordinate Descent. J Stat Softw. 2010;33:1–22.
4. Liaw A, Wiener M. Classification and Regression by randomForest. 2002;
5. Kuhn M. Building Predictive Models in R Using the caret Package. Journal of Statistical Software. 2008;

**Figure E1: Patient inclusion and follow-up.**

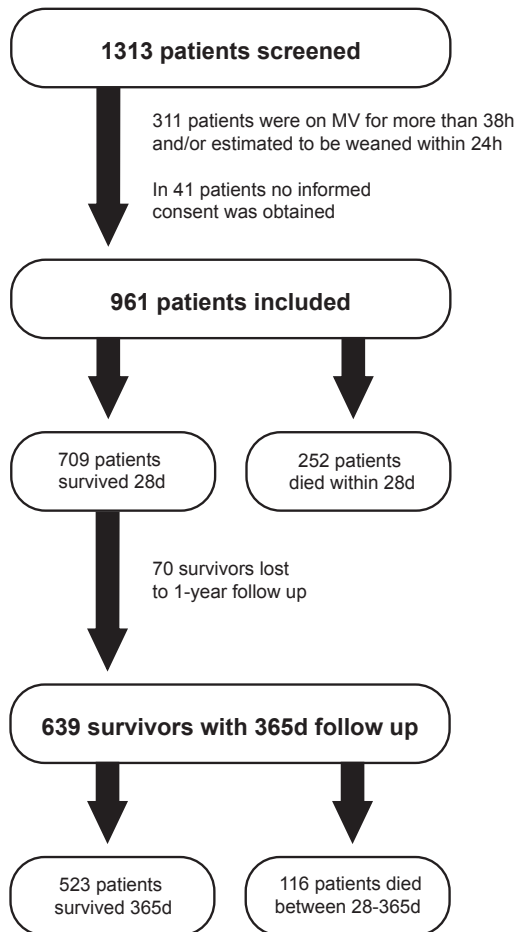

**Figure E2: Mortality and treatment across study inclusion period**

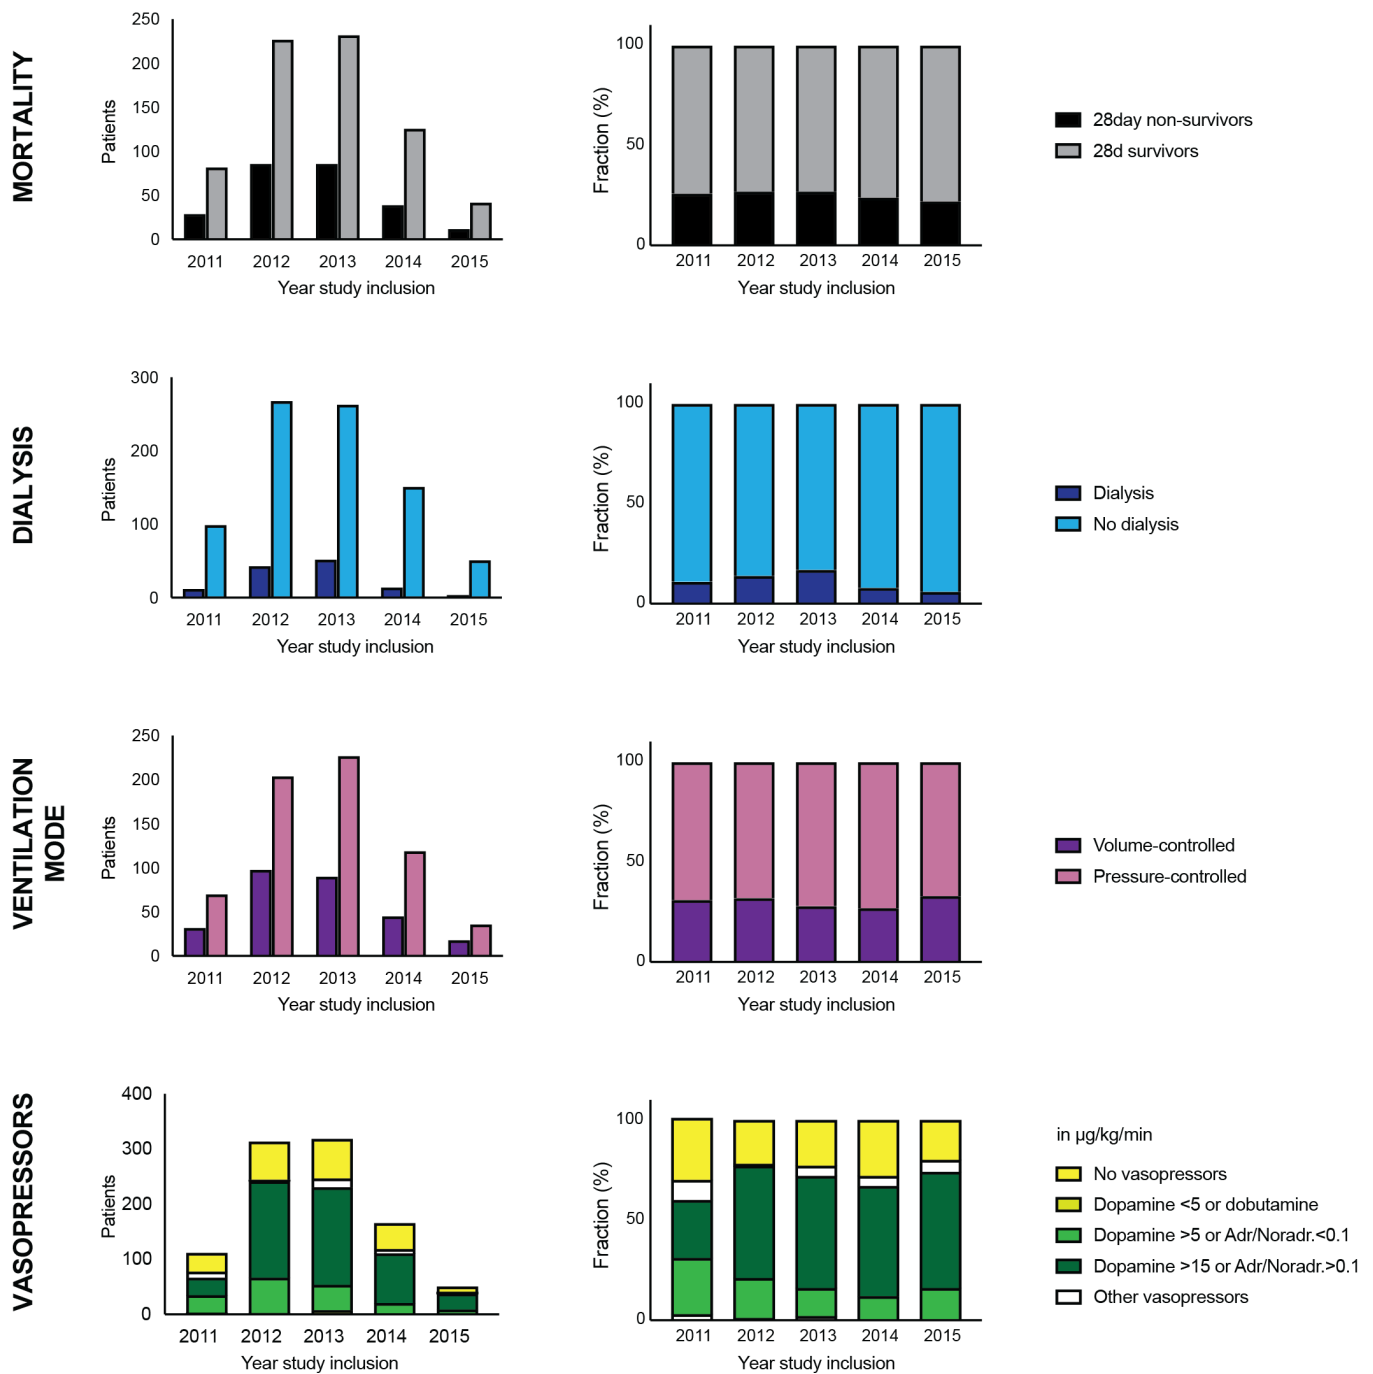

**Figure E3: Calibration of objective markers.** Models were trained in the development cohort and applied to the validation cohort. Calibration of different models in the validation cohort are presented. Due to poor discrimination plots of patient characteristic and treatment models are not shown.

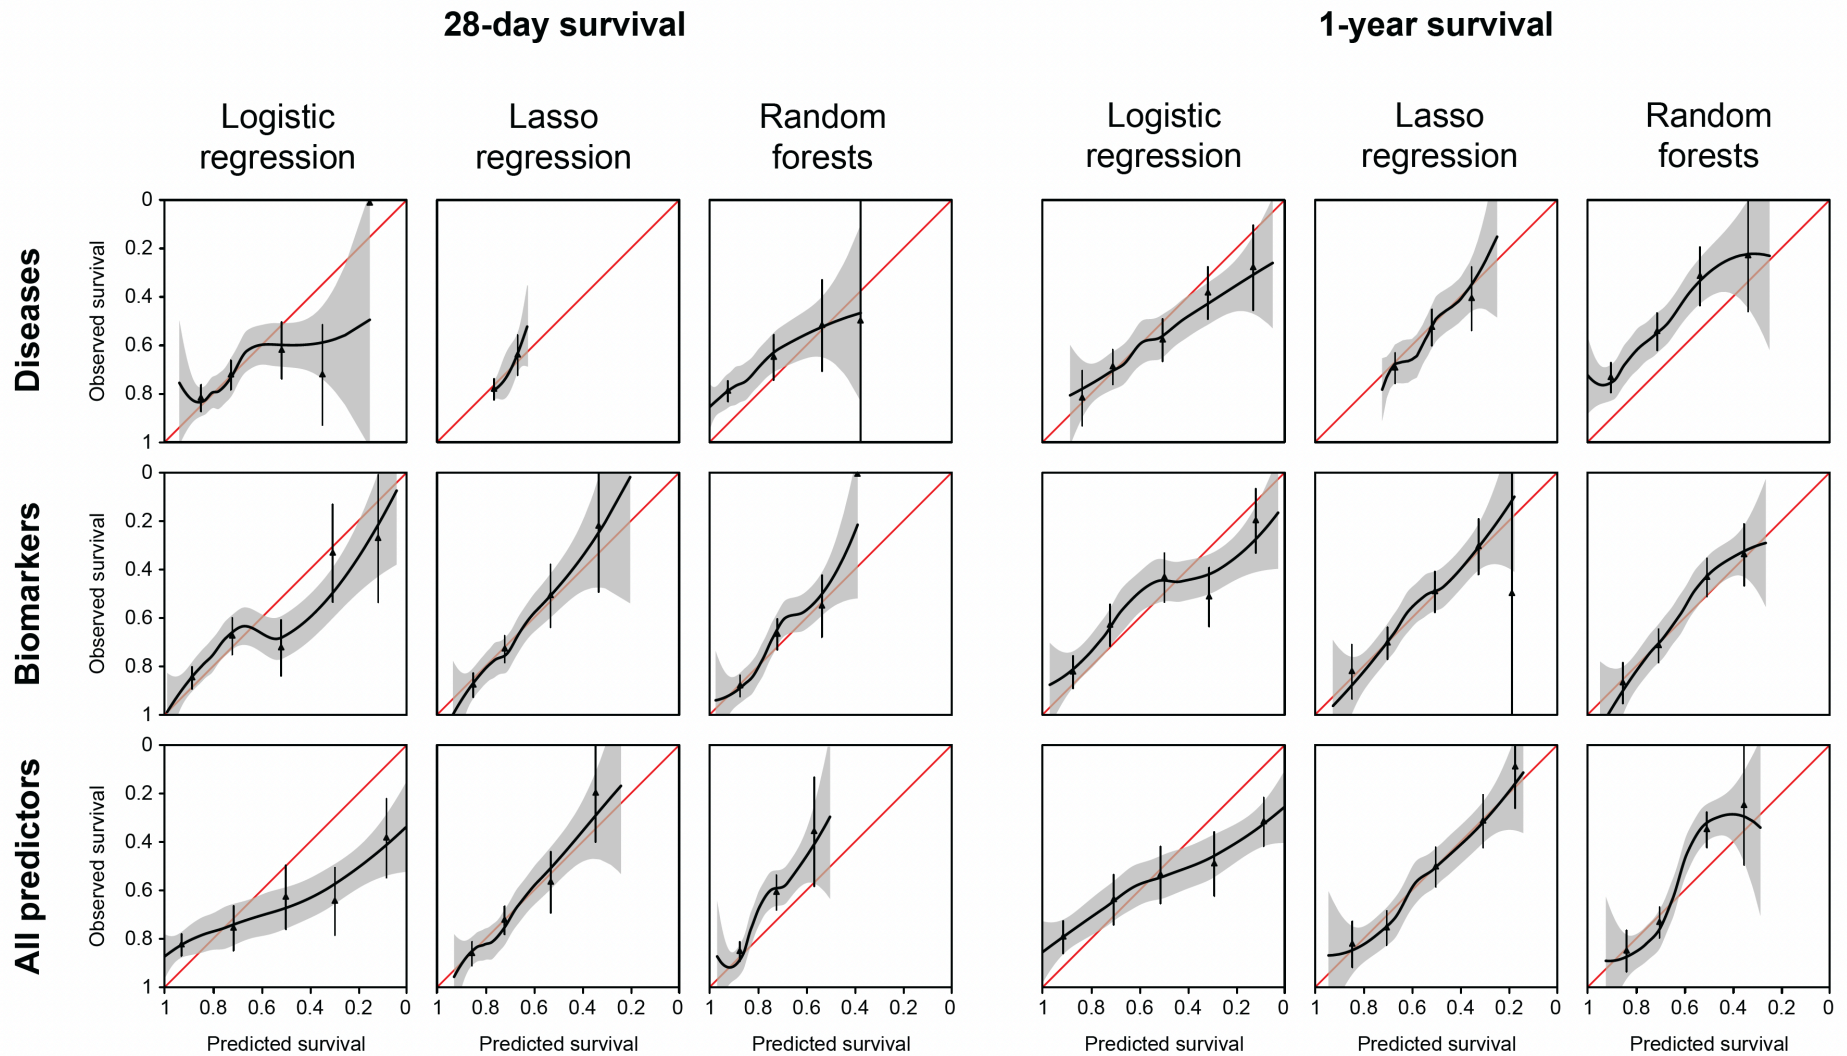

**Table E1: Baseline characteristics of the total population, development and validation cohort.** Categorical data are presented as numbers (%) / total numbers and continuous data as mean  $\pm$  standard deviation / total numbers; \* in  $\mu\text{g}/\text{kg}/\text{min}$ .

|                                             | All patients         | Development cohort | Validation cohort |
|---------------------------------------------|----------------------|--------------------|-------------------|
| <b>Center</b>                               |                      |                    |                   |
| Basel                                       | 566 (58.9%) /961     | 283 (59%)          | 283 (58.8%)       |
| Paris                                       | 60 (6.24%) /961      | 30 (6.25%)         | 30 (6.24%)        |
| Liestal                                     | 19 (1.98%) /961      | 9 (1.88%)          | 10 (2.08%)        |
| Vienna                                      | 132 (13.7%) /961     | 66 (13.8%)         | 66 (13.7%)        |
| Zürich                                      | 184 (19.1%) /961     | 92 (19.2%)         | 92 (19.1%)        |
| <b>Patient characteristics</b>              |                      |                    |                   |
| Age                                         | 63.8 $\pm$ 15.0 /961 | 63.5 $\pm$ 15.2    | 64.1 $\pm$ 14.7   |
| Female sex                                  | 287 (29.9%) /961     | 147 (30.6%)        | 140 (29.1%)       |
| BMI                                         | 26.9 $\pm$ 5.59 /716 | 26.6 $\pm$ 5.31    | 27.3 $\pm$ 5.88   |
| Weight                                      | 78.7 $\pm$ 18 /940   | 77.4 $\pm$ 16.7    | 79.9 $\pm$ 19.1   |
| Height                                      | 171 $\pm$ 9.03 /719  | 171 $\pm$ 8.92     | 171 $\pm$ 9.18    |
| <b>Smoking status</b>                       |                      |                    |                   |
| Never smoker                                | 188 (31.1%) /604     | 82 (28.8%)         | 106 (33.2%)       |
| Current smoker                              | 227 (37.6%) /604     | 110 (38.6%)        | 117 (36.7%)       |
| Former smoker                               | 189 (31.3%) /604     | 93 (32.6%)         | 96 (30.1%)        |
| <b>Diseases</b>                             |                      |                    |                   |
| Pulmonary disease                           | 348 (36.3%) /958     | 184 (38.4%)        | 164 (34.2%)       |
| Cardiac disease                             | 671 (70%) /958       | 328 (68.5%)        | 343 (71.6%)       |
| Renal disease                               | 276 (28.8%) /958     | 148 (30.9%)        | 128 (26.7%)       |
| Gastrointestinal disease                    | 139 (14.5%) /958     | 81 (16.9%)         | 58 (12.1%)        |
| Liver disease                               | 123 (12.8%) /958     | 69 (14.4%)         | 54 (11.3%)        |
| Cancer                                      | 159 (16.6%) /958     | 72 (15%)           | 87 (18.2%)        |
| Neurological disease                        | 249 (26%) /958       | 125 (26.1%)        | 124 (25.9%)       |
| Endocrinological disease / diabetes         | 204 (21.3%) /957     | 103 (21.5%)        | 101 (21.1%)       |
| Immunosuppression                           | 79 (8.25%) /958      | 36 (7.52%)         | 43 (8.98%)        |
| Chronic infection                           | 98 (10.2%) /958      | 60 (12.5%)         | 38 (7.93%)        |
| Chronic substance abuse                     | 94 (9.81%) /958      | 52 (10.9%)         | 42 (8.77%)        |
| Coagulopathy                                | 76 (7.93%) /958      | 44 (9.19%)         | 32 (6.68%)        |
| Trauma                                      | 65 (6.78%) /958      | 38 (7.93%)         | 27 (5.64%)        |
| Organ transplant                            | 29 (3.03%) /958      | 15 (3.13%)         | 14 (2.92%)        |
| Surgical intervention                       | 220 (23%) /958       | 102 (21.3%)        | 118 (24.6%)       |
| Hospitalisation in previous 90 days         | 348 (36.6%) /952     | 163 (34.3%)        | 185 (38.8%)       |
| <b>Admission from</b>                       |                      |                    |                   |
| Home                                        | 341 (35.5%) /960     | 190 (39.6%)        | 151 (31.5%)       |
| Hospital                                    | 566 (59%) /960       | 266 (55.4%)        | 300 (62.5%)       |
| Other ICU                                   | 53 (5.52%) /960      | 24 (5%)            | 29 (6.04%)        |
| <b>Admission type</b>                       |                      |                    |                   |
| Medical                                     | 434 (45.2%) /960     | 226 (47.1%)        | 208 (43.3%)       |
| Scheduled surgical                          | 274 (28.5%) /960     | 114 (23.8%)        | 160 (33.3%)       |
| Unscheduled surgical                        | 252 (26.2%) /960     | 140 (29.2%)        | 112 (23.3%)       |
| Resident of nursing home                    | 25 (2.62%) /955      | 12 (2.52%)         | 13 (2.71%)        |
| <b>Functionality before hospitalisation</b> |                      |                    |                   |
| Good                                        | 345 (48.3%) /715     | 187 (61.3%)        | 158 (38.5%)       |
| Moderate                                    | 258 (36.1%) /715     | 87 (28.5%)         | 171 (41.7%)       |
| Poor                                        | 112 (15.7%) /715     | 31 (10.2%)         | 81 (19.8%)        |
| <b>Therapy</b>                              |                      |                    |                   |
| Haemodialysis (with or without filtration)  | 124 (13%) /956       | 57 (11.9%)         | 67 (14%)          |
| <b>Vasopressors</b>                         |                      |                    |                   |
| No vasopressors                             | 232 (24.1%) /961     | 111 (23.1%)        | 121 (25.2%)       |
| Dopamine <5 or dobutamine*                  | 12 (1.25%) /961      | 5 (1.04%)          | 7 (1.46%)         |
| Dopamine >5 or Adr/Noradr. <0.1*            | 171 (17.8%) /961     | 102 (21.2%)        | 69 (14.3%)        |
| Dopamine >15 or Adr/Noradr. >0.1*           | 505 (52.5%) /961     | 242 (50.4%)        | 263 (54.7%)       |
| other vasopressors                          | 41 (4.27%) /961      | 20 (4.17%)         | 21 (4.37%)        |
| Pressure-controlled ventilation mode        | 656 (69.9%) /939     | 328 (71.5%)        | 328 (68.3%)       |
| Tidal volume (ml)                           | 531 $\pm$ 155 /904   | 532 $\pm$ 163      | 529 $\pm$ 147     |
| PEEP (cmH <sub>2</sub> O)                   | 7.88 $\pm$ 3.07 /940 | 7.74 $\pm$ 3.2     | 8.02 $\pm$ 2.94   |



|                                 | <b>All patients</b> | <b>Development cohort</b> | <b>Validation cohort</b> |
|---------------------------------|---------------------|---------------------------|--------------------------|
| <b>Biomarkers</b>               |                     |                           |                          |
| Respiratory rate (per min)      | 17.5 ±6.19 /935     | 17.2 ±6.12                | 17.8 ±6.25               |
| O2 saturation                   | 96.6 ±3.78 /942     | 96.9 ±3.48                | 96.3 ±4.03               |
| Heart rate (per min)            | 88.4 ±18.8 /958     | 88.8 ±19.1                | 87.9 ±18.5               |
| Blood pressure systolic (mmHg)  | 108 ±22.8 /961      | 108 ±24.7                 | 109 ±20.8                |
| Blood pressure diastolic (mmHg) | 56.6 ±12.8 /959     | 56.7 ±14                  | 56.4 ±11.4               |
| Body temperature (°C)           | 36.7 ±1.35 /926     | 36.8 ±1.37                | 36.7 ±1.32               |
| Glasgow coma scale              | 7.42 ±4.12 /927     | 7.72 ±4.19                | 7.13 ±4.03               |
| <b>Fluid balance</b>            |                     |                           |                          |
| Euvolemic                       | 357 (37.5%) /953    | 188 (39.6%)               | 169 (35.4%)              |
| Hypovolemic                     | 173 (18.2%) /953    | 92 (19.4%)                | 81 (16.9%)               |
| Hypervolemic                    | 423 (44.4%) /953    | 195 (41.1%)               | 228 (47.7%)              |
| <b>Urine output</b>             |                     |                           |                          |
| >1000ml                         | 682 (71.3%) /957    | 326 (68.1%)               | 356 (74.5%)              |
| 500-1000ml                      | 155 (16.2%) /957    | 89 (18.6%)                | 66 (13.8%)               |
| 200-500ml                       | 49 (5.12%) /957     | 33 (6.89%)                | 16 (3.35%)               |
| <200ml                          | 71 (7.42%) /957     | 31 (6.47%)                | 40 (8.37%)               |
| pO2/FiO2 (mmHg)                 | 267 ±113 /941       | 262 ±112                  | 272 ±113                 |
| Fraction of inspired oxygen (%) | 47.9 ±16.1 /957     | 48.1 ±16.3                | 47.8 ±15.9               |
| O2 (mmHg)                       | 115 ±39 /945        | 113 ±37                   | 116 ±40                  |
| CO2 (mmHg)                      | 42 ±9 /946          | 42 ±10                    | 42 ±9                    |
| pH                              | 7.36 ±0.08 /950     | 7.37 ±0.09                | 7.36 ±0.08               |
| HCO3 (mmol/L)                   | 23.1 ±5.09 /947     | 23.5 ±5.33                | 22.8 ±4.83               |
| Lactate (mmol/L)                | 2.93 ±3.31 /948     | 2.92 ±3.51                | 2.94 ±3.1                |
| Leukocytes (G/L)                | 12 ±6.18 /949       | 11.7 ±6.05                | 12.3 ±6.31               |
| Hematocrit (%)                  | 30.2 ±6.35 /953     | 30.3 ±6.44                | 30 ±6.26                 |
| Platelets (G/L)                 | 178 ±123 /959       | 182 ±126                  | 173 ±120                 |
| INR                             | 1.31 ±0.44 /931     | 1.3 ±0.5                  | 1.31 ±0.39               |
| Glucose (mmol/L)                | 7.65 ±2.41 /948     | 7.71 ±2.71                | 7.59 ±2.07               |
| Na (mmol/L)                     | 139 ±4.61 /959      | 140 ±4.76                 | 139 ±4.47                |
| K (mmol/L)                      | 4.53 ±0.64 /958     | 4.53 ±0.65                | 4.53 ±0.62               |
| Albumin (g/L)                   | 22.2 ±7.02 /922     | 21.8 ±7.15                | 22.6 ±6.87               |
| Creatinine (µmol/L)             | 121 ±84.1 /951      | 122 ±81.1                 | 120 ±87.2                |
| Urea (µmol/L)                   | 9.45 ±7.3 /956      | 9.92 ±7.71                | 8.98 ±6.83               |
| Bilirubin (µmol/L)              | 23.5 ±43.5 /935     | 21.7 ±36.1                | 25.3 ±49.9               |
| CRP (mg/L)                      | 109 ±108 /939       | 108 ±107                  | 110 ±108                 |
| Copeptin (pmol/L)               | 87.5 ±90.2 /742     | 87.6 ±92.1                | 87.4 ±88.8               |
| proANP (pmol/L)                 | 286 ±252 /739       | 311 ±296                  | 267 ±211                 |
| proADM (nmol/L)                 | 3.55 ±3.41 /731     | 3.92 ±4.19                | 3.27 ±2.64               |
| <b>Scores</b>                   |                     |                           |                          |
| SOFA                            | 8.7 ±3.43 /877      | 8.65 ±3.33                | 8.75 ±3.53               |
| SAPS2                           | 46.4 ±14.9 /845     | 46.2 ±15.3                | 46.6 ±14.5               |

**Table E2: Single markers for predicting 28-day and 1-year survival.** Categorical data are presented as numbers (%) / total numbers and continuous data as mean  $\pm$  standard deviation / total numbers; \* in  $\mu\text{g}/\text{kg}/\text{min}$ . P-values and odds ratios [95% confidence intervals] of metric data and single categorical predictors were calculated using the Mid-P exact test. Overall p-values (ov.) of categorical data were calculated with the chi-squared or fisher exact test, as appropriate.

|                                      | All patients         | 28-day survivors | 28-day non-survivors | Odds ratio       | P             | All patients with 1-year outcome | 1-year survivors | 1-year non-survivors | Odds ratio       | P             |
|--------------------------------------|----------------------|------------------|----------------------|------------------|---------------|----------------------------------|------------------|----------------------|------------------|---------------|
| <b>Patient characteristics</b>       |                      |                  |                      |                  |               |                                  |                  |                      |                  |               |
| Age                                  | 63.8 $\pm$ 15.0 /961 | 62.8 $\pm$ 14.9  | 66.5 $\pm$ 14.9      | 1.02 [1.01-1.03] | 0.0008        | 64.0 $\pm$ 15.0 /891             | 62.2 $\pm$ 15.3  | 66.5 $\pm$ 14.1      | 1.02 [1.01-1.03] | <0.0001       |
| Female sex                           | 287 (29.9%) /961     | 213 (30%)        | 74 (29.4%)           | 0.97 [0.70-1.32] | 0.8445        | 263 (29.5%) /891                 | 154 (29.4%)      | 109 (29.6%)          | 1.01 [0.75-1.35] | 0.9540        |
| BMI                                  | 26.9 $\pm$ 5.59 /716 | 27.1 $\pm$ 5.52  | 26.5 $\pm$ 5.8       | 0.98 [0.95-1.01] | 0.2219        | 26.9 $\pm$ 5.62 /651             | 27.1 $\pm$ 5.34  | 26.6 $\pm$ 5.98      | 0.98 [0.96-1.01] | 0.2680        |
| Weight                               | 78.7 $\pm$ 18 /940   | 79.5 $\pm$ 18.1  | 76.3 $\pm$ 17.6      | 0.99 [0.98-1.00] | 0.0158        | 78.4 $\pm$ 17.6 /873             | 79.3 $\pm$ 16.8  | 77.2 $\pm$ 18.6      | 0.99 [0.99-1.00] | 0.0800        |
| Height                               | 171 $\pm$ 9.03 /719  | 171 $\pm$ 9.21   | 170 $\pm$ 8.48       | 0.99 [0.97-1.01] | 0.2671        | 171 $\pm$ 9 /654                 | 171 $\pm$ 9.5    | 170 $\pm$ 8.28       | 0.99 [0.98-1.01] | 0.4131        |
| Smoking status                       |                      |                  |                      |                  | 0.7474 (ov.)  |                                  |                  |                      |                  | 0.2567 (ov.)  |
| Never smoker                         | 188 (31.1%) /604     | 146 (31.9%)      | 42 (28.8%)           | Ref.             | Ref.          | 171 (30.7%) /557                 | 106 (32.9%)      | 65 (27.7%)           | Ref.             | Ref.          |
| Current smoker                       | 227 (37.6%) /604     | 169 (36.9%)      | 58 (39.7%)           | 1.19 [0.76-1.89] | 0.4501        | 206 (37%) /557                   | 120 (37.3%)      | 86 (36.6%)           | 1.17 [0.77-1.77] | 0.4639        |
| Former smoker                        | 189 (31.3%) /604     | 143 (31.2%)      | 46 (31.5%)           | 1.12 [0.69-1.81] | 0.6491        | 180 (32.3%) /557                 | 96 (29.8%)       | 84 (35.7%)           | 1.42 [0.93-2.19] | 0.1028        |
| <b>Diseases</b>                      |                      |                  |                      |                  |               |                                  |                  |                      |                  |               |
| Pulmonary disease                    | 348 (36.3%) /958     | 251 (35.6%)      | 97 (38.5%)           | 1.13 [0.84-1.53] | 0.4057        | 325 (36.5%) /890                 | 169 (32.3%)      | 156 (42.5%)          | 1.55 [1.17-2.04] | 0.0020        |
| Cardiac disease                      | 671 (70%) /958       | 501 (71%)        | 170 (67.5%)          | 0.85 [0.62-1.16] | 0.2991        | 625 (70.2%) /890                 | 372 (71.1%)      | 253 (68.9%)          | 0.90 [0.67-1.21] | 0.4824        |
| Renal disease                        | 276 (28.8%) /958     | 170 (24.1%)      | 106 (42.1%)          | 2.29 [1.69-3.10] | <0.0001       | 255 (28.7%) /890                 | 103 (19.7%)      | 152 (41.4%)          | 2.88 [2.14-3.89] | <0.0001       |
| Gastrointestinal disease             | 139 (14.5%) /958     | 100 (14.2%)      | 39 (15.5%)           | 1.11 [0.74-1.65] | 0.6078        | 126 (14.2%) /890                 | 65 (12.4%)       | 61 (16.6%)           | 1.40 [0.96-2.05] | 0.0799        |
| Liver disease                        | 123 (12.8%) /958     | 70 (9.92%)       | 53 (21%)             | 2.42 [1.63-3.57] | <0.0001       | 115 (12.9%) /890                 | 45 (8.6%)        | 70 (19.1%)           | 2.50 [1.68-3.76] | <0.0001       |
| Cancer                               | 159 (16.6%) /958     | 108 (15.3%)      | 51 (20.2%)           | 1.41 [0.97-2.03] | 0.0749        | 146 (16.4%) /890                 | 68 (13%)         | 78 (21.3%)           | 1.80 [1.26-2.58] | 0.0012        |
| Neurological disease                 | 249 (26%) /958       | 182 (25.8%)      | 67 (26.6%)           | 1.04 [0.75-1.44] | 0.7979        | 232 (26.1%) /890                 | 143 (27.3%)      | 89 (24.3%)           | 0.85 [0.62-1.16] | 0.3024        |
| Endocrinological disease / diabetes  | 204 (21.3%) /957     | 153 (21.7%)      | 51 (20.2%)           | 0.92 [0.64-1.30] | 0.6321        | 186 (20.9%) /889                 | 101 (19.3%)      | 85 (23.2%)           | 1.26 [0.91-1.74] | 0.1710        |
| Immunosuppression                    | 79 (8.25%) /958      | 47 (6.66%)       | 32 (12.7%)           | 2.04 [1.26-3.27] | 0.0042        | 72 (8.09%) /890                  | 25 (4.78%)       | 47 (12.8%)           | 2.91 [1.77-4.90] | <0.0001       |
| Chronic infection                    | 98 (10.2%) /958      | 68 (9.63%)       | 30 (11.9%)           | 1.27 [0.79-1.99] | 0.3102        | 90 (10.1%) /890                  | 38 (7.27%)       | 52 (14.2%)           | 2.10 [1.35-3.29] | 0.0009        |
| Chronic substance abuse              | 94 (9.81%) /958      | 66 (9.35%)       | 28 (11.1%)           | 1.22 [0.75-1.92] | 0.4198        | 85 (9.55%) /890                  | 46 (8.8%)        | 39 (10.6%)           | 1.23 [0.78-1.93] | 0.3629        |
| Coagulopathy                         | 76 (7.93%) /958      | 41 (5.81%)       | 35 (13.9%)           | 2.61 [1.61-4.21] | 0.0001        | 67 (7.53%) /890                  | 20 (3.82%)       | 47 (12.8%)           | 3.67 [2.16-6.46] | <0.0001       |
| Trauma                               | 65 (6.78%) /958      | 54 (7.65%)       | 11 (4.37%)           | 0.56 [0.27-1.05] | 0.0700        | 64 (7.19%) /890                  | 52 (9.94%)       | 12 (3.27%)           | 0.31 [0.15-0.57] | 0.0001        |
| Organ transplant                     | 29 (3.03%) /958      | 17 (2.41%)       | 12 (4.76%)           | 2.03 [0.93-4.31] | 0.0751        | 28 (3.15%) /890                  | 10 (1.91%)       | 18 (4.9%)            | 2.62 [1.21-6.02] | 0.0141        |
| Surgical intervention                | 220 (23%) /958       | 161 (22.8%)      | 59 (23.4%)           | 1.04 [0.73-1.45] | 0.8389        | 207 (23.3%) /890                 | 120 (22.9%)      | 87 (23.7%)           | 1.04 [0.76-1.43] | 0.7902        |
| Hospitalisation in previous 90 days  | 348 (36.6%) /952     | 247 (35.1%)      | 101 (40.6%)          | 1.26 [0.93-1.69] | 0.1285        | 326 (37%) /882                   | 164 (31.7%)      | 162 (44.4%)          | 1.72 [1.30-2.27] | 0.0001        |
| Admission from                       |                      |                  |                      |                  | 0.3886 (ov.)  |                                  |                  |                      |                  | 0.0509 (ov.)  |
| Home                                 | 341 (35.5%) /960     | 259 (36.5%)      | 82 (32.7%)           | Ref.             | Ref.          | 308 (34.6%) /890                 | 189 (36.1%)      | 119 (32.4%)          | Ref.             | Ref.          |
| Hospital                             | 566 (59%) /960       | 414 (58.4%)      | 152 (60.6%)          | 1.16 [0.85-1.59] | 0.3508        | 535 (60.1%) /890                 | 314 (60%)        | 221 (60.2%)          | 1.12 [0.84-1.49] | 0.4479        |
| Other ICU                            | 53 (5.52%) /960      | 36 (5.08%)       | 17 (6.77%)           | 1.50 [0.78-2.78] | 0.2196        | 47 (5.28%) /890                  | 20 (3.82%)       | 27 (7.36%)           | 2.14 [1.15-4.04] | 0.0166        |
| Admission type                       |                      |                  |                      |                  | 0.0001 (ov.)  |                                  |                  |                      |                  | <0.0001 (ov.) |
| Medical                              | 434 (45.2%) /960     | 294 (41.5%)      | 140 (55.8%)          | Ref.             | Ref.          | 380 (42.7%) /890                 | 179 (34.2%)      | 201 (54.8%)          | Ref.             | Ref.          |
| Scheduled surgical                   | 274 (28.5%) /960     | 224 (31.6%)      | 50 (19.9%)           | 0.47 [0.32-0.67] | <0.0001       | 268 (30.1%) /890                 | 186 (35.6%)      | 82 (22.3%)           | 0.39 [0.28-0.55] | <0.0001       |
| Unscheduled surgical                 | 252 (26.2%) /960     | 191 (26.9%)      | 61 (24.3%)           | 0.67 [0.47-0.95] | 0.0251        | 242 (27.2%) /890                 | 158 (30.2%)      | 84 (22.9%)           | 0.47 [0.34-0.66] | <0.0001       |
| Resident of nursing home             | 25 (2.62%) /955      | 18 (2.56%)       | 7 (2.79%)            | 1.11 [0.42-2.60] | 0.8233        | 24 (2.71%) /885                  | 13 (2.5%)        | 11 (3.01%)           | 1.21 [0.52-2.77] | 0.6449        |
| Functionality before hospitalisation |                      |                  |                      |                  | <0.0001 (ov.) |                                  |                  |                      |                  | <0.0001 (ov.) |
| Good                                 | 345 (48.3%) /715     | 279 (52.2%)      | 66 (36.5%)           | Ref.             | Ref.          | 317 (47.7%) /664                 | 227 (56.6%)      | 90 (34.2%)           | Ref.             | Ref.          |
| Moderate                             | 258 (36.1%) /715     | 188 (35.2%)      | 70 (38.7%)           | 1.57 [1.07-2.31] | 0.0210        | 241 (36.3%) /664                 | 137 (34.2%)      | 104 (39.5%)          | 1.91 [1.34-2.73] | 0.0003        |
| Poor                                 | 112 (15.7%) /715     | 67 (12.5%)       | 45 (24.9%)           | 2.83 [1.78-4.51] | <0.0001       | 106 (16%) /664                   | 37 (9.23%)       | 69 (26.2%)           | 4.68 [2.94-7.54] | <0.0001       |

|                                                      | All patients     | 28-day survivors | 28-day non-survivors | Odds ratio       | P             | All patients with 1-year outcome | 1-year survivors | 1y non-survivors | Odds ratio       | P             |
|------------------------------------------------------|------------------|------------------|----------------------|------------------|---------------|----------------------------------|------------------|------------------|------------------|---------------|
| <b>Therapy</b>                                       |                  |                  |                      |                  |               |                                  |                  |                  |                  |               |
| Haemodialysis (with or without filtration)           | 124 (13%) /956   | 62 (8.78%)       | 62 (24.8%)           | 3.42 [2.32-5.05] | <0.0001       | 116 (13.1%) /886                 | 37 (7.1%)        | 79 (21.6%)       | 3.60 [2.39-5.52] | <0.0001       |
| Vasopressors                                         |                  |                  |                      |                  | 0.0002 (ov.)  |                                  |                  |                  |                  | <0.0001 (ov.) |
| No vasopressors                                      | 232 (24.1%) /961 | 196 (27.6%)      | 36 (14.3%)           | Ref.             | Ref.          | 223 (25%) /891                   | 169 (32.3%)      | 54 (14.7%)       | Ref.             | Ref.          |
| Dopamine <5 or dobutamine*                           | 12 (1.25%) /961  | 7 (0.99%)        | 5 (1.98%)            | 3.89 [1.07-13.2] | 0.0404        | 11 (1.23%) /891                  | 3 (0.57%)        | 8 (2.17%)        | 8.01 [2.18-39.6] | 0.0015        |
| Dopamine >5 or Adr/Noradr. <0.1*                     | 171 (17.8%) /961 | 121 (17.1%)      | 50 (19.8%)           | 2.24 [1.38-3.67] | 0.0010        | 150 (16.8%) /891                 | 81 (15.5%)       | 69 (18.8%)       | 2.66 [1.71-4.16] | <0.0001       |
| Dopamine >15 or Adr/Noradr. >0.1* other vasopressors | 505 (52.5%) /961 | 358 (50.5%)      | 147 (58.3%)          | 2.23 [1.50-3.38] | <0.0001       | 468 (52.5%) /891                 | 248 (47.4%)      | 220 (59.8%)      | 2.77 [1.95-3.98] | <0.0001       |
| other vasopressors                                   | 41 (4.27%) /961  | 27 (3.81%)       | 14 (5.56%)           | 2.82 [1.32-5.86] | 0.0084        | 39 (4.38%) /891                  | 22 (4.21%)       | 17 (4.62%)       | 2.41 [1.18-4.89] | 0.0167        |
| Pressure-controlled ventilation mode                 | 656 (69.9%) /939 | 498 (71.4%)      | 158 (65.3%)          | 0.75 [0.55-1.03] | 0.0746        | 595 (68.5%) /869                 | 354 (69.3%)      | 241 (67.3%)      | 0.91 [0.68-1.22] | 0.5415        |
| Tidal volume (ml)                                    | 531 ±155 /904    | 538 ±157         | 510 ±147             | 1.00 [1.00-1.00] | 0.0174        | 534 ±158 /835                    | 555 ±164         | 507 ±146         | 1.00 [1.00-1.00] | <0.0001       |
| PEEP (cmH2O)                                         | 7.88 ±3.07 /940  | 7.8 ±3.03        | 8.1 ±3.18            | 1.03 [0.98-1.08] | 0.1965        | 7.87 ±3.08 /870                  | 7.84 ±3.05       | 7.92 ±3.12       | 1.01 [0.96-1.05] | 0.7327        |
| <b>Biomarkers</b>                                    |                  |                  |                      |                  |               |                                  |                  |                  |                  |               |
| Respiratory rate (per min)                           | 17.5 ±6.19 /935  | 17.1 ±6.22       | 18.8 ±5.93           | 1.05 [1.02-1.07] | 0.0002        | 17.6 ±6.21 /866                  | 16.8 ±6.19       | 18.6 ±6.1        | 1.05 [1.02-1.07] | 0.0001        |
| O2 saturation                                        | 96.6 ±3.78 /942  | 96.7 ±3.77       | 96.3 ±3.81           | 0.97 [0.94-1.01] | 0.1499        | 96.7 ±3.85 /873                  | 96.9 ±3.85       | 96.2 ±3.82       | 0.95 [0.92-0.99] | 0.0080        |
| Heart rate (per min)                                 | 88.4 ±18.8 /958  | 88.6 ±18.4       | 87.7 ±20             | 1.00 [0.99-1.01] | 0.4975        | 88.4 ±18.7 /889                  | 88 ±17.8         | 88.9 ±20         | 1.00 [1.00-1.01] | 0.4736        |
| Blood pressure systolic (mmHg)                       | 108 ±22.8 /961   | 108 ±22.9        | 109 ±22.6            | 1.00 [0.99-1.01] | 0.9642        | 108 ±22.9 /891                   | 107 ±22.9        | 109 ±23          | 1.00 [1.00-1.01] | 0.2613        |
| Blood pressure diastolic (mmHg)                      | 56.6 ±12.8 /959  | 57 ±13.1         | 55.4 ±11.8           | 0.99 [0.98-1.00] | 0.1042        | 56.5 ±13 /889                    | 57 ±13.4         | 55.7 ±12.3       | 0.99 [0.98-1.00] | 0.1577        |
| Body temperature (°C)                                | 36.7 ±1.35 /926  | 36.8 ±1.24       | 36.4 ±1.55           | 0.80 [0.72-0.88] | <0.0001       | 36.8 ±1.33 /857                  | 36.9 ±1.2        | 36.5 ±1.48       | 0.82 [0.74-0.91] | 0.0001        |
| Glasgow coma scale                                   | 7.42 ±4.12 /927  | 7.76 ±4.03       | 6.45 ±4.24           | 0.92 [0.89-0.96] | <0.0001       | 7.63 ±4.09 /861                  | 8.2 ±3.81        | 6.81 ±4.34       | 0.92 [0.89-0.95] | <0.0001       |
| Fluid balance                                        |                  |                  |                      |                  | 0.0663 (ov.)  |                                  |                  |                  |                  | 0.047 (ov.)   |
| Euvolemic                                            | 357 (37.5%) /953 | 273 (38.8%)      | 84 (33.6%)           | Ref.             | Ref.          | 325 (36.8%) /883                 | 192 (36.9%)      | 133 (36.6%)      | Ref.             | Ref.          |
| Hypovolemic                                          | 173 (18.2%) /953 | 116 (16.5%)      | 57 (22.8%)           | 1.60 [1.07-2.38] | 0.0233        | 151 (17.1%) /883                 | 76 (14.6%)       | 75 (20.7%)       | 1.42 [0.96-2.10] | 0.0752        |
| Hypervolemic                                         | 423 (44.4%) /953 | 314 (44.7%)      | 109 (43.6%)          | 1.13 [0.81-1.57] | 0.4723        | 407 (46.1%) /883                 | 252 (48.5%)      | 155 (42.7%)      | 0.89 [0.66-1.20] | 0.4358        |
| Urine output                                         |                  |                  |                      |                  | <0.0001 (ov.) |                                  |                  |                  |                  | <0.0001 (ov.) |
| >1000ml                                              | 682 (71.3%) /957 | 538 (76.1%)      | 144 (57.6%)          | Ref.             | Ref.          | 639 (72%) /887                   | 421 (80.8%)      | 218 (59.6%)      | Ref.             | Ref.          |
| 500-1000ml                                           | 155 (16.2%) /957 | 106 (15%)        | 49 (19.6%)           | 1.73 [1.17-2.53] | 0.0065        | 139 (15.7%) /887                 | 64 (12.3%)       | 75 (20.5%)       | 2.26 [1.56-3.29] | <0.0001       |
| 200-500ml                                            | 49 (5.12%) /957  | 27 (3.82%)       | 22 (8.8%)            | 3.04 [1.66-5.51] | 0.0004        | 43 (4.85%) /887                  | 12 (2.3%)        | 31 (8.47%)       | 4.94 [2.54-10.2] | <0.0001       |
| <200ml                                               | 71 (7.42%) /957  | 36 (5.09%)       | 35 (14%)             | 3.62 [2.19-6.00] | <0.0001       | 66 (7.44%) /887                  | 24 (4.61%)       | 42 (11.5%)       | 3.36 [2.00-5.79] | <0.0001       |
| pO2/FiO2 (mmHg)                                      | 267 ±113 /941    | 272 ±109         | 253 ±120             | 1.00 [1.00-1.00] | 0.0232        | 269 ±114 /872                    | 281 ±112         | 252 ±115         | 1.00 [1.00-1.00] | 0.0002        |
| Fraction of inspired oxygen (%)                      | 47.9 ±16.1 /957  | 46.8 ±14.8       | 51.1 ±18.8           | 1.02 [1.01-1.02] | 0.0004        | 48.2 ±15.9 /887                  | 46.8 ±13.8       | 50.4 ±18.3       | 1.01 [1.01-1.02] | 0.0010        |
| O2 (mmHg)                                            | 115 ±39 /945     | 115 ±38          | 113 ±41              | 1.00 [1.00-1.00] | 0.6289        | 116 ±39 /876                     | 119 ±39          | 112 ±39          | 0.99 [0.99-1.00] | 0.0048        |
| CO2 (mmHg)                                           | 42 ±9 /946       | 42 ±9            | 41 ±10               | 0.99 [0.98-1.01] | 0.4219        | 42 ±9 /878                       | 42 ±9            | 42 ±10           | 1.00 [0.98-1.01] | 0.6970        |
| pH                                                   | 7.36 ±0.08 /950  | 7.37 ±0.07       | 7.33 ±0.1            | 0.00 [0.00-0.02] | <0.0001       | 7.36 ±0.08 /881                  | 7.37 ±0.07       | 7.34 ±0.1        | 0.02 [0.00-0.09] | <0.0001       |
| HCO3 (mmol/L)                                        | 23.1 ±5.09 /947  | 23.7 ±4.67       | 21.6 ±5.83           | 0.92 [0.89-0.94] | <0.0001       | 23.1 ±5.14 /878                  | 23.7 ±4.48       | 22.2 ±5.85       | 0.94 [0.92-0.97] | <0.0001       |
| Lactate (mmol/L)                                     | 2.93 ±3.31 /948  | 2.43 ±2.42       | 4.35 ±4.74           | 1.18 [1.13-1.24] | <0.0001       | 3 ±3.41 /879                     | 2.42 ±2.24       | 3.82 ±4.44       | 1.15 [1.09-1.21] | <0.0001       |
| Leukocytes (G/L)                                     | 12 ±6.18 /949    | 12 ±5.84         | 12.1 ±7.11           | 1.00 [0.98-1.03] | 0.7232        | 12 ±6.08 /879                    | 11.9 ±5.57       | 12.2 ±6.75       | 1.01 [0.99-1.03] | 0.4846        |
| Hematocrit (%)                                       | 30.2 ±6.35 /953  | 30.1 ±6.12       | 30.3 ±6.96           | 1.01 [0.98-1.03] | 0.6573        | 30 ±6.19 /883                    | 30.1 ±5.96       | 29.8 ±6.52       | 0.99 [0.97-1.02] | 0.5381        |
| Platelets (G/L)                                      | 178 ±123 /959    | 180 ±123         | 171 ±124             | 1.00 [1.00-1.00] | 0.3314        | 178 ±124 /889                    | 178 ±111         | 177 ±141         | 1.00 [1.00-1.00] | 0.9183        |
| INR                                                  | 1.31 ±0.44 /931  | 1.26 ±0.37       | 1.45 ±0.58           | 2.48 [1.74-3.53] | <0.0001       | 1.31 ±0.45 /862                  | 1.25 ±0.38       | 1.4 ±0.52        | 2.27 [1.56-3.31] | <0.0001       |
| Glucose (mmol/L)                                     | 7.65 ±2.41 /948  | 7.63 ±2.23       | 7.73 ±2.87           | 1.02 [0.96-1.08] | 0.5677        | 7.63 ±2.41 /880                  | 7.58 ±2.29       | 7.7 ±2.58        | 1.02 [0.97-1.08] | 0.4821        |
| Na (mmol/L)                                          | 139 ±4.61 /959   | 139 ±4.29        | 140 ±5.41            | 1.02 [0.99-1.05] | 0.2641        | 139 ±4.68 /889                   | 139 ±4.24        | 140 ±5.24        | 1.01 [0.99-1.04] | 0.3245        |
| K (mmol/L)                                           | 4.53 ±0.64 /958  | 4.52 ±0.6        | 4.57 ±0.73           | 1.13 [0.91-1.42] | 0.2731        | 4.54 ±0.64 /889                  | 4.5 ±0.61        | 4.59 ±0.69       | 1.25 [1.01-1.54] | 0.0372        |
| Albumin (g/L)                                        | 22.2 ±7.02 /922  | 22.2 ±6.9        | 22.3 ±7.36           | 1.00 [0.98-1.02] | 0.7814        | 21.9 ±6.87 /857                  | 21.8 ±6.63       | 22 ±7.21         | 1.01 [0.99-1.03] | 0.5588        |
| Creatinine (µmol/L)                                  | 121 ±84.1 /951   | 114 ±81.2        | 140 ±89.2            | 1.00 [1.00-1.01] | 0.0001        | 121 ±83.6 /882                   | 106 ±67.9        | 142 ±98.4        | 1.01 [1.00-1.01] | <0.0001       |
| Urea (µmol/L)                                        | 9.45 ±7.3 /956   | 8.69 ±7.37       | 11.6 ±6.65           | 1.05 [1.03-1.07] | <0.0001       | 9.41 ±7.02 /886                  | 7.82 ±6.06       | 11.7 ±7.64       | 1.10 [1.07-1.13] | <0.0001       |
| Bilirubin (µmol/L)                                   | 23.5 ±43.5 /935  | 19.9 ±32.8       | 33.7 ±64.2           | 1.01 [1.00-1.01] | 0.0004        | 23.1 ±41.8 /873                  | 18.9 ±29.5       | 29.2 ±54.3       | 1.01 [1.00-1.01] | 0.0017        |
| CRP (mg/L)                                           | 109 ±108 /939    | 106 ±104         | 116 ±118             | 1.00 [1.00-1.00] | 0.2224        | 108 ±107 /870                    | 96.9 ±94.4       | 123 ±121         | 1.00 [1.00-1.00] | 0.0004        |
| Copeptin (pmol/L)                                    | 87.5 ±90.2 /742  | 80.8 ±84.5       | 107 ±103             | 1.00 [1.00-1.00] | 0.0008        | 88.9 ±90.9 /694                  | 79.7 ±84.6       | 103 ±98.1        | 1.00 [1.00-1.00] | 0.0014        |
| proANP (pmol/L)                                      | 286 ±252 /739    | 260 ±232         | 362 ±291             | 1.00 [1.00-1.00] | <0.0001       | 286 ±254 /691                    | 227 ±161         | 376 ±331         | 1.00 [1.00-1.00] | <0.0001       |
| proADM (nmol/L)                                      | 3.55 ±3.41 /731  | 3.16 ±2.88       | 4.72 ±4.45           | 1.13 [1.08-1.18] | <0.0001       | 3.49 ±3.3 /684                   | 2.73 ±2.3        | 4.64 ±4.13       | 1.24 [1.17-1.32] | <0.0001       |
| <b>Scores</b>                                        |                  |                  |                      |                  |               |                                  |                  |                  |                  |               |
| SOFA                                                 | 8.7 ±3.43 /877   | 8.25 ±3.28       | 10 ±3.51             | 1.17 [1.11-1.22] | <0.0001       | 8.62 ±3.43 /821                  | 7.79 ±3.16       | 9.83 ±3.47       | 1.20 [1.15-1.26] | <0.0001       |
| SAPS2                                                | 46.4 ±14.9 /845  | 43.5 ±13.9       | 54.8 ±14.5           | 1.06 [1.04-1.07] | <0.0001       | 45.9 ±15.1 /789                  | 40.9 ±13.3       | 53.2 ±14.6       | 1.06 [1.05-1.08] | <0.0001       |
